# Supplementary material
Source: PubMed Central journal article supplement (PMC7137093)
Supplement: NIHMS1577414-supplement-1.pdf [file NIHMS1577414-supplement-1.pdf]

## Supplemental Information

### **The Mitochondrial Transacylase, Tafazzin, Regulates AML Stemness by Modulating Intracellular Levels of Phospholipids**

**Ayesh K. Seneviratne, Mingjing Xu, Juan J. Aristizabal Henao, Val A. Fajardo, Zhenyue Hao, Veronique Voisin, G. Wei Xu, Rose Hurren, S. Kim, Neil MacLean, Xiaoming Wang, Marcela Gronda, Danny Jeyaraju, Yulia Jitkova, Troy Ketela, Michael Mullokandov, David Sharon, Geethu Thomas, Raphaël Chouinard-Watkins, James R. Hawley, Caitlin Schafer, Helen Loo Yau, Zaza Khuchua, Ahmed Aman, Rima Al-awar, Atan Gross, Steven M. Claypool, Richard P. Bazinet, Mathieu Lupien, Steven Chan, Daniel D. De Carvalho, Mark D. Minden, Gary D. Bader, Ken D. Stark, Paul LeBlanc, and Aaron D. Schimmer**

**Figure S1. Related to Figure 1**

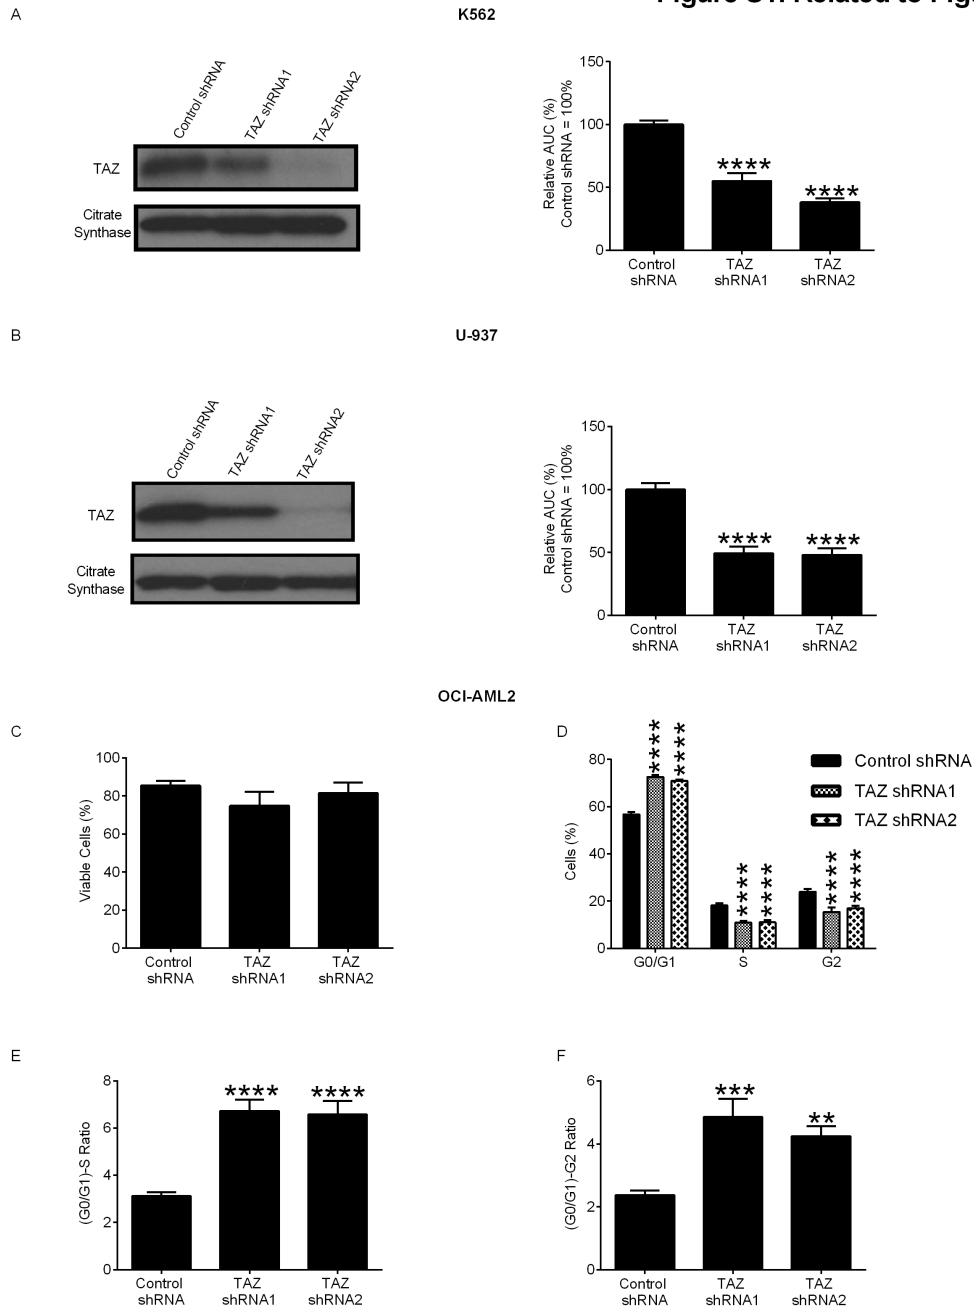

**Figure S1. Related to Figure 1. Knockdown of Tafazzin reduces the growth of leukemia cells lines.**

(A-B) Proliferation and TAZ protein expression of K562 (A) and U-937 (B) cells after TAZ knockdown. The relative AUC of viable cell counts over 12 days are shown (Control shRNA = 100%). Data are relative mean  $\pm$  SEM (N = 4, K562; N = 3, U-937, Control shRNA=100%). \*\*\*\*p<0.0001 using one-way ANOVA and Dunett's post hoc test.

(C) Cell viability of OCI-AML2 cells after TAZ knockdown. Data are mean  $\pm$  SEM of three independent experiments.

(D-F) Cell cycle status (D) (G0/G1)-S ratio (E), or (G0/G1)-G2 ratio (F), after TAZ knockdown. Data are mean  $\pm$  SEM of three independent experiments. \*\*p<0.01, \*\*\*p<0.001, \*\*\*\*p<0.0001 by Two-Way ANOVA (cell cycle status) or one-way ANOVA (all other graphs) and Dunett's post hoc test.

Figure S2. Related to Figure 2

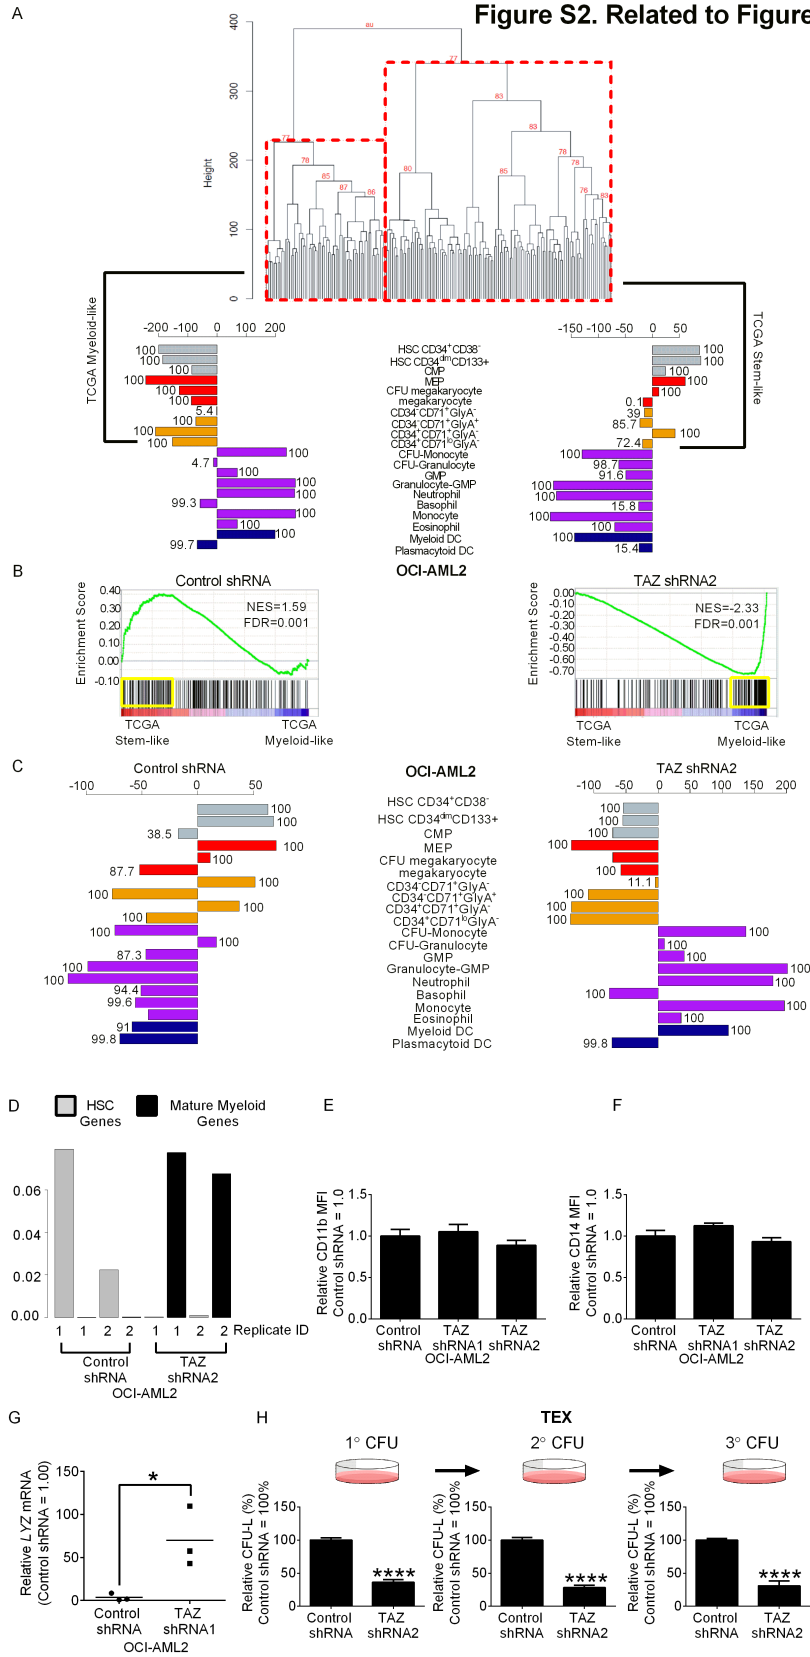

**Figure S2. Related to Figure 2. Knockdown of Tafazzin reduces AML Stemness and increases the expression of genes associated with granulocytic/neutrophilic populations.**

(A) Unsupervised hierarchical clustering of gene expression data from the TCGA AML cohort (n = 179). Values above each branching represent percent approximate unbiased p values calculated by 1000 bootstrap resampling using the R package pvclust. The most differentially expressed genes (top 500) genes between the two TCGA clusters were compared with Gene Expression Omnibus dataset GSE24759 (DMAP) populations. Each bar is a measure of the expression of these genes in each DMAP population compared to the mean of all DMAP populations (mean is equal to 0). Numbers beside bars indicate the percentage of time for which the observed value was better represented in a specific DMAP population than random values (equal number of randomly selected genes based on 1,000 trials).

(B) Gene set enrichment analysis (GSEA) measure of the TCGA stem-like or myeloid-like genes in the TAZ shRNA or control shRNA gene signatures. The normalized enrichment scores (NES), and false discovery rates (FDRs) are indicated in each plot.

(C) The most differentially expressed genes (top 500) between TAZ shRNA2 and control samples were compared with Gene Expression Omnibus dataset GSE24759 (DMAP) populations. Each bar is a measure of the expression of these genes in each DMAP population compared to the mean of all populations (mean is equal to 0). Numbers beside bars indicate the percentage of time for which the observed value was better represented in a specific DMAP than random values (equal number of randomly selected genes based on 1,000 trials).

(D) Proportions of control shRNA or TAZ-KD samples that possess gene expression profiles of undifferentiated HSC or mature myeloid cells, as determined by the perturbation (PERT) deconvolution analysis using gene expression data from normal hematopoietic subsets.

(E-F) CD11b (E) and CD14 (F) expression in OCI-AML2 cells after TAZ knockdown. Data are relative mean fluorescent intensity (MFI)  $\pm$  SD (n = 3, Control shRNA = 1.0).

(G) Lysozyme (*LYZ*) levels in OCI-AML2 cells transplanted into SCID mice after TAZ knockdown. Data represent relative mean  $\pm$  SD (n = 3 mice/group, Control shRNA = 1.0). \*p $\leq$ 0.5 by Student's t-test.

(H) Clonogenic growth of TEX cells after TAZ knockdown upon serial replating. Data are relative mean  $\pm$  SEM of three independent experiments (Control shRNA = 100%). \*\*\*\*p $\leq$ 0.0001 by Student's t-test.

Figure S3. Related to Figure 3

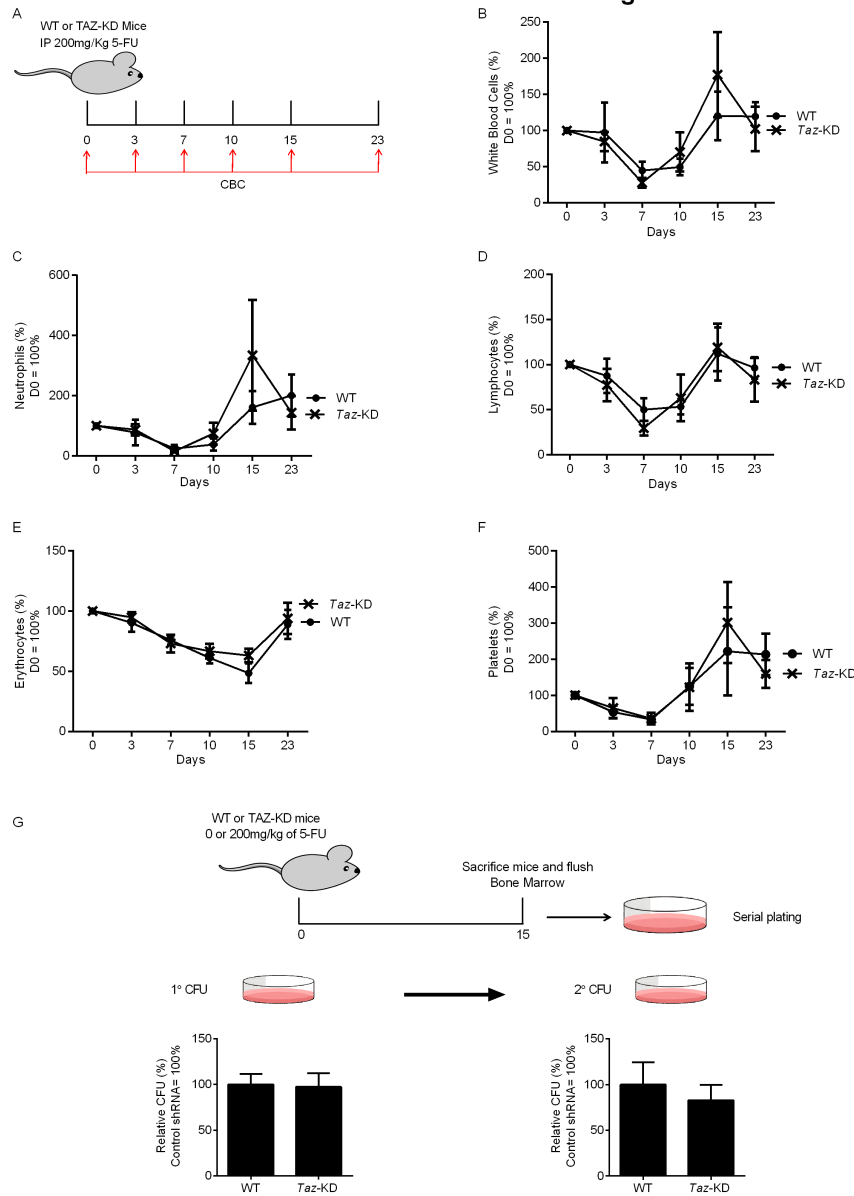

**Figure S3. Related to Figure 3. Mature blood counts and progenitor cell function of WT and *Taz*-KD mice after the induction of hematopoietic stress.**

(A) Schematic outlining the induction of hematopoietic stress by 5-FU.

WT and *Taz*-KD mice were treated with 200mg/kg of 5-FU i.p. Arrows indicate the days that peripheral blood of WT and TAZ-KD mice were collected.

(B-F) White blood cells (B), neutrophils (C), lymphocytes (D), erythrocytes (E), and platelets (F) levels in the mice in A. Data are relative mean  $\pm$  SEM of 2 independent mouse groups ( $n = 7$  WT mice, and  $n = 6$  *Taz*-KD mice, D0 = 100%).

(G) Clonogenic growth of hematopoietic cells in 5-FU treated *Taz*-KD mice upon serial replating. Data represent relative mean  $\pm$  SEM of 2 independent mouse groups ( $n = 7$  WT mice, and  $n = 5$  *Taz*-KD mice, WT mice CFU-GM=100%).

Figure S4. Related to Figure 4

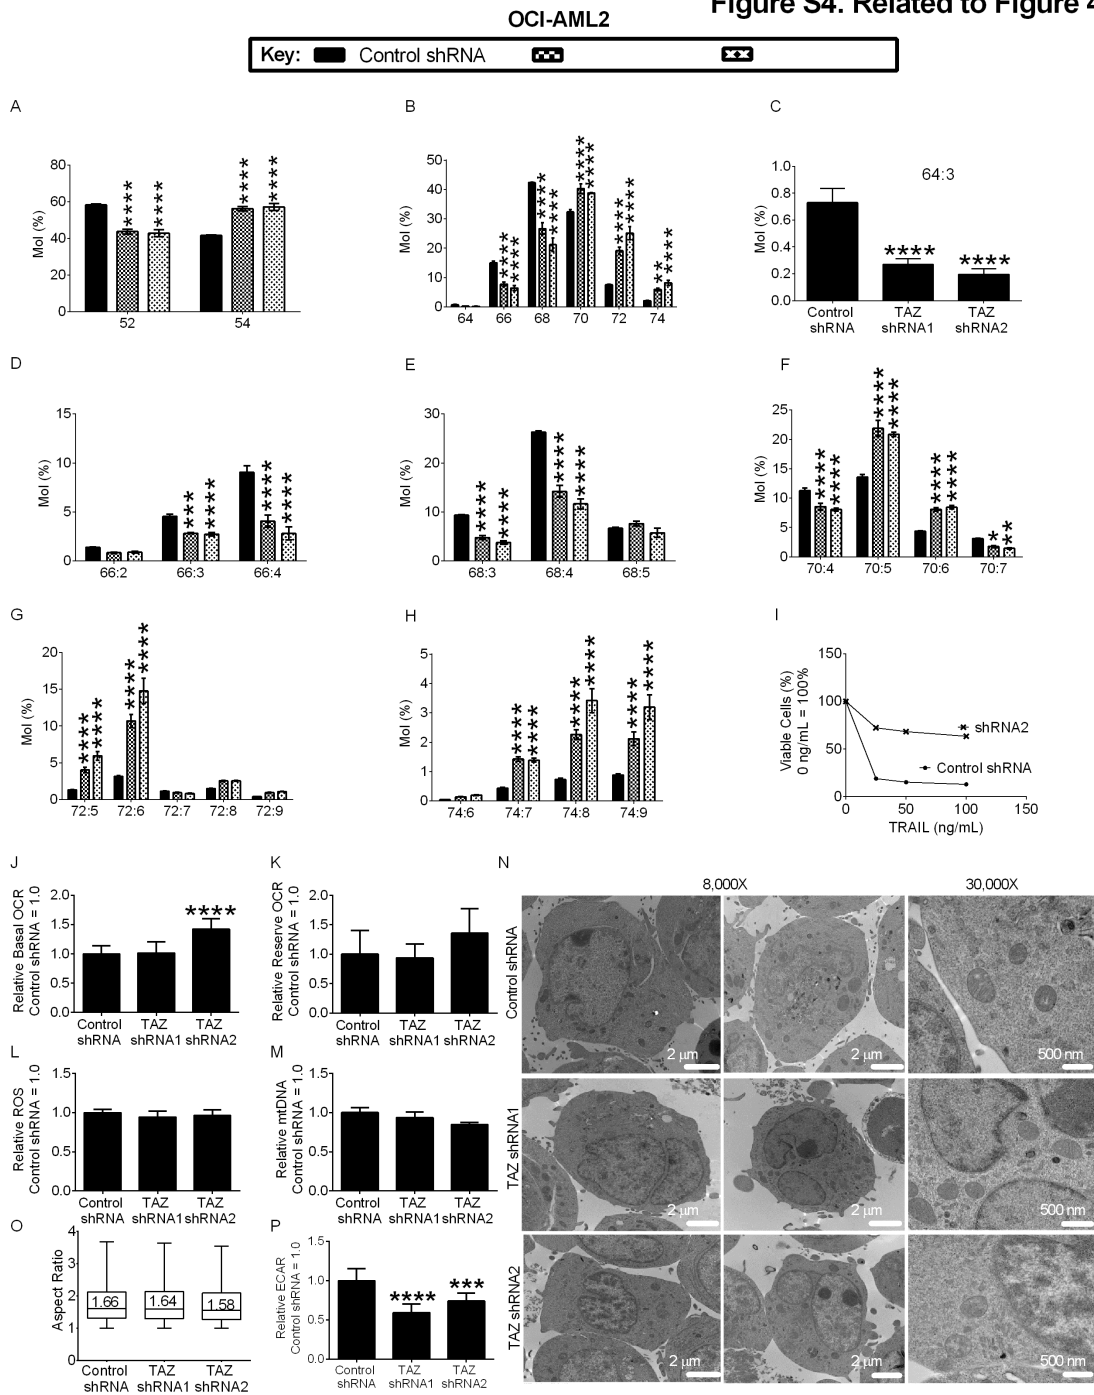

**Figure S4 Related to figure 4. Knockdown of Tafazzin in OCI-AML2 cells reduces TAZ activity but does not affect mitochondrial structure or function.**

(A-H) The relative abundance of MLCL given chain lengths (A), CL chain lengths (B), and the distribution of double bonds per acyl chain length (C-H). Data are mean  $\pm$  SEM of three independent experiments. \* $p \leq 0.05$ , \*\* $p \leq 0.01$ , \*\*\* $p \leq 0.001$ , \*\*\*\* $p \leq 0.0001$  by one-way ANOVA (64:3 graph), Two-Way ANOVA (all other graphs), and a post hoc Dunnett's test.

(I) Cell viability of OCI-AML2 cell after TAZ knockdown when treated with cyclohexamide, and TRAIL for 16 hours. Data are relative mean  $\pm$  SD of a representative experiment from 3 independent experiments (0ng/mL TRAIL = 100%).

(J-K) Basal OCR (J) and reserve OCR (K) in OCI-AML2 cells after TAZ knockdown. Data are relative mean  $\pm$  SD of a representative experiment from 3 independent experiments (Control shRNA=100%). \*\*\*\* $p \leq 0.0001$  by one-way ANOVA, and a Dunnett's post hoc test.

(L) Cellular ROS of OCI-AML2 cells after TAZ knockdown. Data are mean  $\pm$  SD of a representative experiment from 3 independent experiments (Control shRNA = 100%)

(M) Mitochondrial mass of OCI-AML2 cell after TAZ knockdown by the measurement of ND1 levels. Data represent mean  $\pm$  SD (n=3, Control shRNA = 1.0).

(N) Mitochondrial morphology of cells from D. Composite of representative images are shown. Scale bar = 2 $\mu$ m or 500nm

(O) Boxplot of mitochondrial aspect ratio in OCI-AML2 cells after TAZ knockdown.

(P) ECAR of cells from (A). Data are relative mean  $\pm$  SD of a representative experiment from 3 independent experiments (Control shRNA=100%). \*\*\*\*p $\leq$ 0.0001 by one-way ANOVA, and a Dunnett's post hoc test.

**Figure S5. Related to Figure 4**

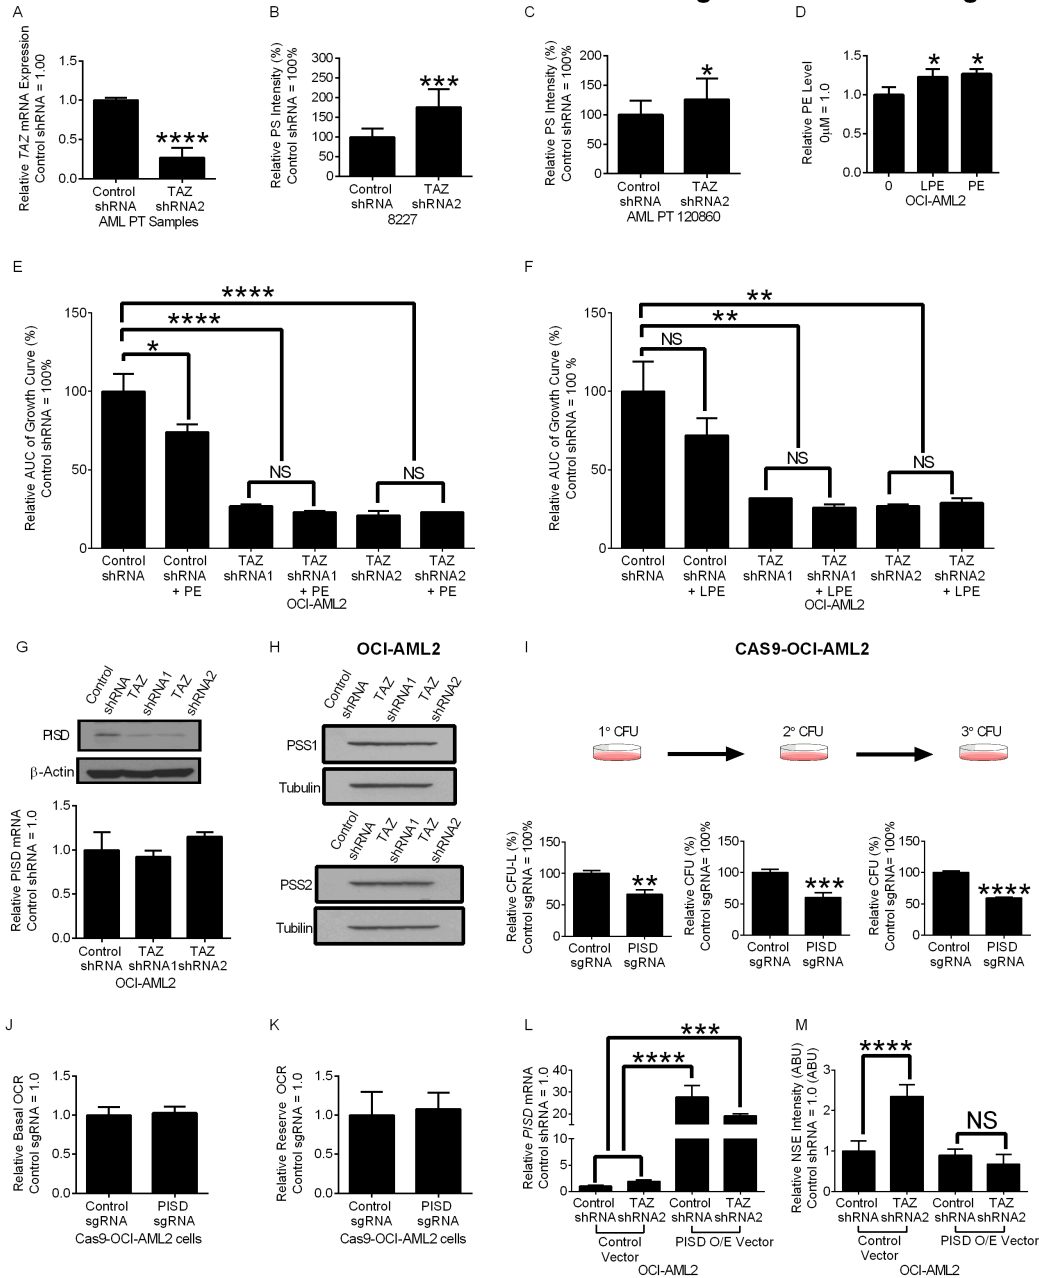

**Figure S5. Related to Figure 4 Phosphatidylserine accumulation, as well as PISD decrease is functionally important in AML growth and viability after TAZ-KD.**

(A) QRT-PCR of TAZ in primary AML cells after TAZ knockdown. Data are mean  $\pm$  SEM of two independent experiments. \*\*\*\* $p$   $\leq$  0.0001 Student's t-test.

(B-C) Intracellular phosphatidylserine levels of 8227 (B), and primary AML cells (C). Data are mean integrated PS staining intensity/DAPI+ cells  $\pm$  SD (n = 8-12 images). \* $p$   $\leq$  0.5, \*\*\* $p$   $\leq$  0.001 by Student's t-test.

(D) Phosphatidylethanolamine (PE) levels in OCI-AML2 cells after PE or lyso-phosphatidylethanolamine (LPE) supplementation. Data are mean  $\pm$  SD (n = 3, Control = 1.0). \* $p$   $\leq$  0.05 by one-way ANOVA, and Dunnett's post hoc test.

(E-F) Proliferation TAZ knockdown OCI-AML cells after PE (E) or LPE (F) supplementation. The relative area under the curve (AUC) of viable cell counts 12 days after transduction is shown (Control shRNA = 100%). Data represents mean  $\pm$  SD of representative experiment from 3 independent experiments. \* $p$   $\leq$  0.05, \*\* $p$   $\leq$  0.01, \*\*\*\* $p$   $\leq$  0.001 by one-way ANOVA and Tukey's post hoc test.

(G) Protein and mRNA levels of the PE synthesizing enzyme phosphatidylserine decarboxylase (PISD) in OCI-AML2 cells after TAZ knockdown. An immunoblot from three independent experiments is shown. QRT-PCR data are mean  $\pm$  SD (n = 3, Control shRNA = 1.0).



(H) Protein levels of the PS synthesizing enzymes PS synthase 1 (PSS1) and PS synthase 2 (PSS2) in OCI-AML2 cells after TAZ knockdown. An immunoblot from four independent experiments is shown.

(I) Clonogenic growth of Cas9-OCI-AML2 after PISD knockout upon serial replating. Data are relative mean  $\pm$  SEM of 2 independent experiments. (Control sgRNA=100%). \*\* $p \leq 0.01$  \*\*\* $p \leq 0.001$ , \*\*\*\* $p \leq 0.001$  by Student's t-test.

(J-K) Basal OCR (J) and reserve OCR (K) in of Cas9-OCI-AML2 after PISD knockout. Data are relative mean  $\pm$  SD of a representative experiment from 2 independent experiments (Control shRNA = 1.0).

(L-M) PISD mRNA expression (L) and NSE staining (M) of TAZ knockdown OCI-AML2 cells after PISD over expression. In (L) Data are mean  $\pm$  SD (n = 3). \*\*\* $p \leq 0.001$ , \*\*\*\* $p \leq 0.0001$  by one-way ANOVA and Tukey's post hoc test. In (M) data represent relative mean  $\pm$  SD of a representative experiment from 2 independent experiments (Control shRNA = 100%). \*\*\*\* $p \leq 0.0001$  by one-way ANOVA and Tukey's post hoc test.

**Figure S6. Related to Figure 6**

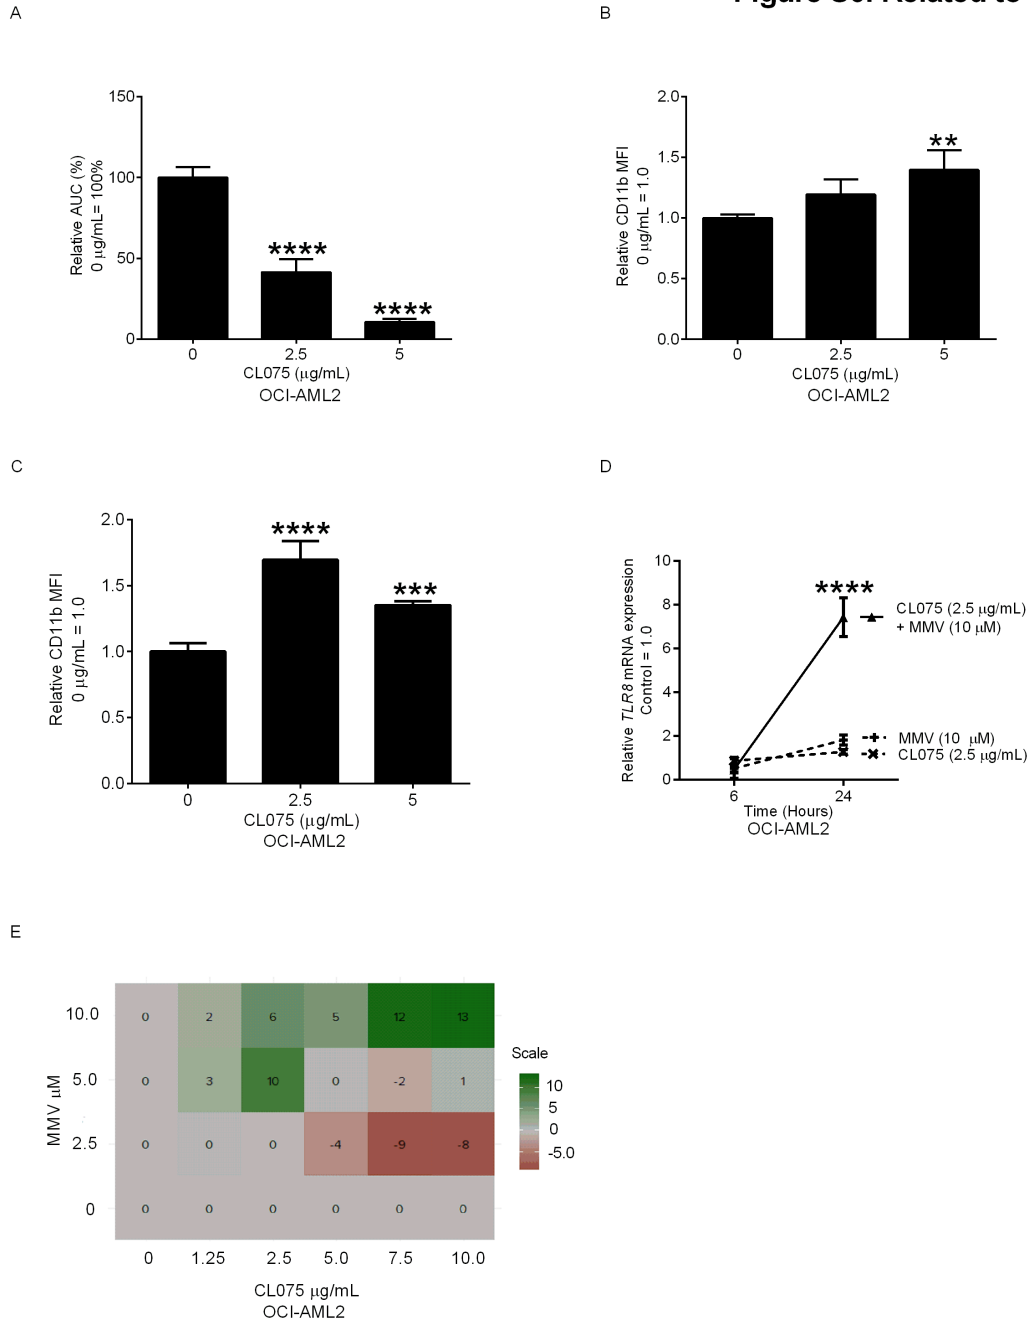

**Figure S6. Related to Figure 6. TLR8 agonist CL075 reduces stemness in OCI-AML2 cells, and synergizes with MMV007285.**

(A) Proliferation of OCI-AML2 cells after treatment with increasing concentrations of CL075 or vehicle controls. The relative AUC of viable cell counts over 14 days are shown (Control shRNA = 100%). Data are the relative mean  $\pm$  SEM (0μM = 100%) of two independent experiments. \*\*\*p<0.001, \*\*\*\*p<0.0001 by one-way ANOVA and Dunnett's post hoc test.

(B-C) CD11b expression in OCI-AML2 cells seven (B) or fourteen (C) days after treatment with CL075. Data are relative mean fluorescent intensity (MFI)  $\pm$  SEM of 2-3 independent experiments (0μM = 1.0). \*\*p<0.01, \*\*\*p<0.001, \*\*\*\*p<0.0001 by one-way ANOVA and Dunnett's post hoc test.

(D) QRT-PCR of toll-like receptor 8 (*TLR8*) of OCI-AML2 cells were treated with 6 or 24 hours after treatment with MMV007285 alone, CL075 alone or MMV007285 + CL075. Data represent mean  $\pm$  SD (n = 3, Control, 0μM MMV + 0μg/mL CL075 = 1.0). \*\*\*\*p<0.0001 by Two-Way ANOVA and Tukey's post hoc test.

(E) Excess over bliss additivism score of the combination of MMV007285 and CL075 on cell viability. A representative experiment of two independent experiments is shown.

Figure S7. Related to Figure 7

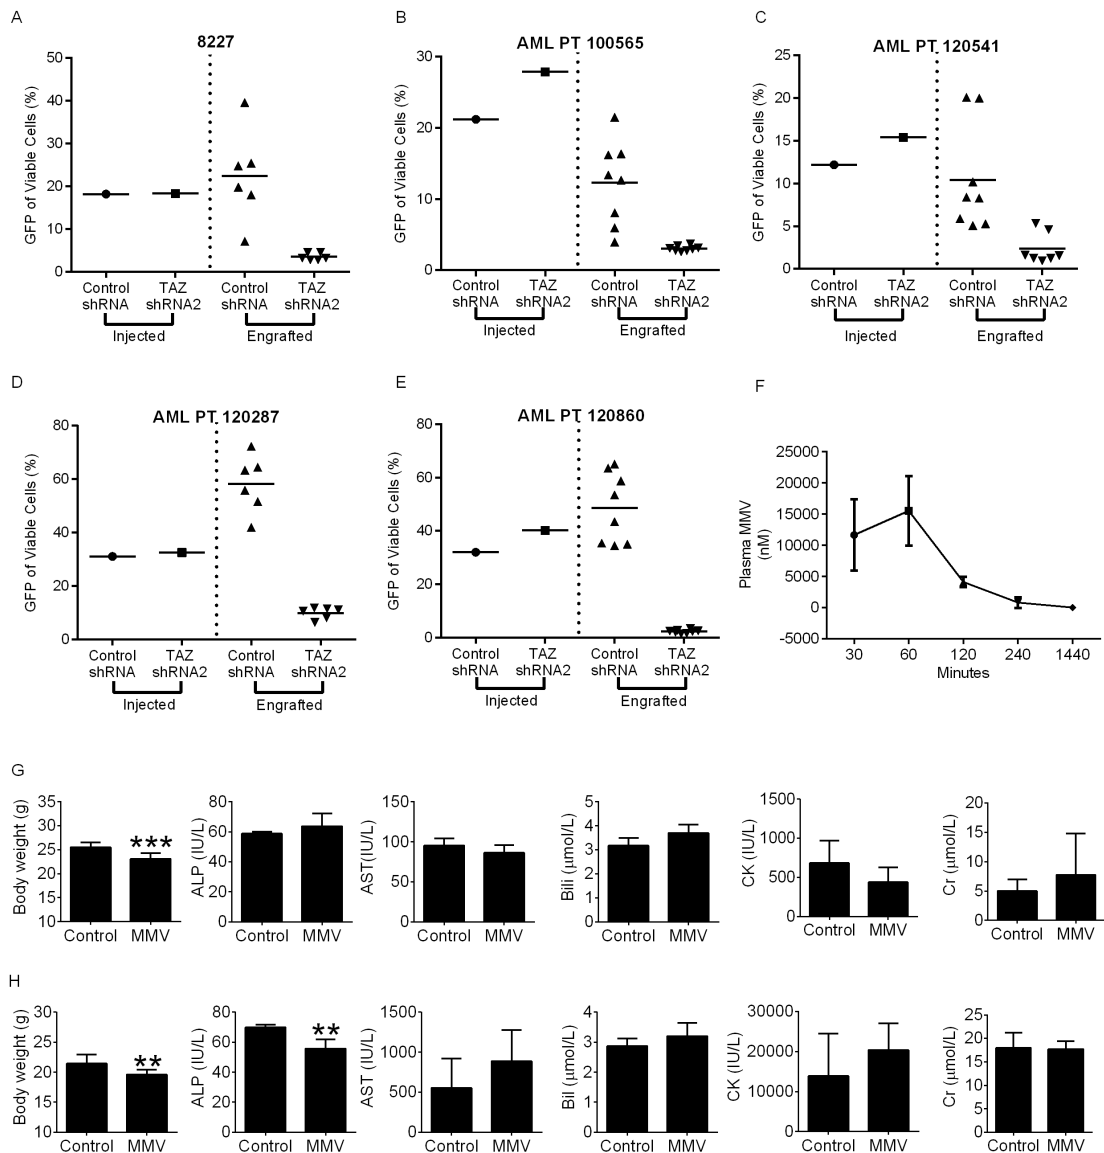

Figure S7. Related to figure 7 increased PS reduces leukemia burden in xenograft models of human AML.

(A-E) Raw data of the engraftment experiment performed in 8227 (A), and AML patient sample cells (B-E) evaluating the impact of TAZ loss on engraftment potential. The y-axis (%GFP+ cells in viable cells) indicates % of shRNA-positive cells in injected or engrafted human cells. In the engrafted group each dot represents an individual mouse, lines represent mean. This figure is related to the normalized relative engraftment potential data presented in Figure 7A-E.

(F) Plasma concentration of intact MMV007285 in SCID mice treated with a single dose of MMV007285 (100mg/kg) dissolved in 5% DMSO, 47.5% PEG400, and 47.5% H<sub>2</sub>O containing 10% Tween80, via oral gavage. Data represent mean ± SD (n = 3 mice).

(G) Mice body weights, biochemical markers of liver (alkaline phosphatase, aspartate transaminase, bilirubin), muscle (creatinine kinase), and renal (creatinine) toxicity of SCID mice xenografted with OCI-AML2 cells MMV007285 or vehicle control. Data represent mean ± SD (n = 10 mice per group for body weights, and n = 4 mice/group for biochemical markers).

(H) Mice body weight, biochemical markers of liver (alkaline phosphatase, aspartate transaminase, bilirubin), muscle (creatinine kinase), and renal (creatinine) toxicity of NOD/SCID mice injected with primary AML patient samples treated with MMV007285 or vehicle control. Data represent mean ± SD (n = 9 mice vehicle control group, n=10 mice MMV group). \*\*p<0.01, as determined by Student's t-test

## Supplementary Tables

| Condition                            | Mouse Type         | Mouse ID           | Cell Number (1 x 10 <sup>6</sup> ) |      |
|--------------------------------------|--------------------|--------------------|------------------------------------|------|
| Basal Hematopoiesis                  | WT                 | 100                | 58.2                               |      |
|                                      |                    | 114                | 75.9                               |      |
|                                      |                    | 115                | 51.9                               |      |
|                                      |                    | 121                | 39.1                               |      |
|                                      |                    | 124                | 41.8                               |      |
|                                      |                    | 130                | 50.8                               |      |
|                                      |                    | 131                | 44.5                               |      |
|                                      |                    | 132                | 36.7                               |      |
|                                      |                    | 133                | 31.6                               |      |
|                                      |                    | 134                | 31.9                               |      |
|                                      |                    | Average            | 46.2                               |      |
|                                      |                    | Standard Deviation | 12.9                               |      |
|                                      |                    | TAZ-KD             | 104                                | 50.0 |
|                                      |                    |                    | 105                                | 49.2 |
|                                      |                    |                    | 108                                | 62.0 |
|                                      |                    |                    | 113                                | 57.9 |
|                                      |                    |                    | 116                                | 66.0 |
|                                      |                    |                    | 122                                | 52.9 |
|                                      |                    |                    | 123                                | 53.2 |
|                                      |                    |                    | 136                                | 28.3 |
|                                      | Average            |                    | 52.4                               |      |
|                                      | Standard Deviation |                    | 11.4                               |      |
| Hematopoietic Stress (200mg/kg 5-FU) |                    | 154                | 7.2                                |      |
|                                      |                    | 156                | 10.0                               |      |
|                                      |                    | 195                | 22.0                               |      |
|                                      |                    | 197                | 35.0                               |      |
|                                      |                    | 198                | 33.0                               |      |
|                                      |                    | Average            | 21.4                               |      |
|                                      |                    | Standard Deviation | 12.8                               |      |
|                                      |                    | TAZ-KD             | 152                                | 23.0 |
|                                      |                    |                    | 153                                | 12.5 |
|                                      |                    |                    | 155                                | 7.1  |
|                                      |                    |                    | 159                                | 8.5  |
|                                      |                    |                    | 192                                | 19.0 |
|                                      |                    |                    | 193                                | 45.0 |
|                                      |                    |                    | Average                            | 19.2 |
|                                      | Standard Deviation | 6.82               |                                    |      |

Table S2. Mouse Bone Marrow Mononuclear Cell Count, Related to Figures 3 and S3.

| Cell line | Species                      | Tissue           | Sex    | Age |
|-----------|------------------------------|------------------|--------|-----|
| OCI-AML2  | <i>Homo sapiens</i> , human  | Peripheral Blood | Male   | 65  |
| TEX       | <i>Homo sapiens</i> , human  | Cord Blood       | n/a    | n/a |
| U-937     | <i>Homo sapiens</i> , human  | Pleural Effusion | Male   | 37  |
| K562      | <i>Homo sapiens</i> , human  | Bone Marrow      | Female | 53  |
| 8227      | <i>Homo sapiens</i> , humans | n/a              | n/a    | n/a |
| 293T      | <i>Homo sapiens</i> , humans | Fetal Kidney     | n/a    | n/a |

Table S3. Cell Lines, Related to STAR Methods.

| Gene                          | Strand  | Sequence                         | Reference               |
|-------------------------------|---------|----------------------------------|-------------------------|
| TAZ (Human AML)               | Forward | 5'-TTGCTGCCTTCTGGATTCTT-3'       | This study              |
|                               | Reverse | 5'-CCCTGCCTAAGCTTCTTCCT-3'       |                         |
| PISD (Human AML)              | Forward | 5'-CAACCTCAGCGAGTTCTTCC-3'       | This Study              |
|                               | Reverse | 5'-CGACTCCAGGGAGTAGGTGA-3'       |                         |
| 18srRNA (housekeeping, human) | Forward | 5'-AGGAATTGACGGAAGGGCAC-3'       | Lab Stock               |
|                               | Reverse | 5'-GGACATCTAAGGGCATCACA-3'       |                         |
| LYZ                           | Forward | 5'-GCCAAATGGGAGAGTGGTTA-3'       | This Study              |
|                               | Reverse | 5'-ATCACGGACAACCCTCTTTG-3'       |                         |
| iDOX-Taz-shRNA Transgene      | Forward | 5'-CCATGGAATTCGAACGCTGACGTC-3'   | Khuchua Lab             |
|                               | Reverse | 5'-TATGGGCTATGAACTAATGACCC-3'    |                         |
| ND1                           | Forward | 5'-AACATACCCATGGCCAACCT-3'       | Lab Stock               |
|                               | Reverse | 5'-AGCGAAGGGTTGTAGTAGCCC-3'      |                         |
| HGB                           | Forward | 5'-GAAGAGCCAAGGACAGGTAC-3'       | Lab Stock               |
|                               | Reverse | 5'-CAACTTCATCCACGTTACC-3'        |                         |
| TLR4                          | Forward | 5'-TGAGCAGTCGTGCTGGTATC-3'       | This Study              |
|                               | Reverse | 5'-CAGGGCTTTTCTGAGTCGTC-3'       |                         |
| TLR8                          | Forward | 5'-CAGAGCATCAACCAAGCAA-3'        | This Study              |
|                               | Reverse | 5'-CTGTAACACTGGCTCCAGCA-3'       |                         |
| IL6                           | Forward | 5'-GGAGACTTGCCTGGTAAAA-3'        | (Murakami et al., 2013) |
|                               | Reverse | 5'-GTCAGGGGTGGTTATTGCAT-3'       |                         |
| IFN $\beta$                   | Forward | 5'-CAACTTGCTTGGATTCCACAAAG-3'    | This Study              |
|                               | Reverse | 5'-TATTC AAGCCTCCCAATTC AATTG-3' |                         |

Table S4. PCR Primers, Related to STAR Methods.

| Patient ID | Disease                                  | Age at Collection | Sex | Cytogenetics                                                                                       | Molecular        | Status of Sample |
|------------|------------------------------------------|-------------------|-----|----------------------------------------------------------------------------------------------------|------------------|------------------|
| 110839     | AML, undifferentiated                    | 86                | M   | 58-59,CYY,-2,-3,-4,-5,-6,-7,-9,-12,-13,add(15)(q24)x2,-16,-16,-17,-17,-19,-20,+22,+r,+2-7mar[cp14] | Not Done         | Diagnostic       |
| 0676       | AML, undifferentiated                    | 79                | M   | 46-48,XY,+6,del(13)(q12q22),+del(13)(q12q22)[cp9]/46,XY[11]                                        | Not Done         | Diagnostic       |
| 120021     | AML, with maturation                     | 88                | F   | 46,XX,1~5dmin[13]/46,XX[7]                                                                         | Not Done         | Diagnostic       |
| 160556     | AML with myelodysplasia-related features | 57                |     | 46,XY,t(3;5)(q21;q35)[10]                                                                          | Not Done         | Diagnostic       |
| 162111     | AML with mutated NPM1                    | 18                | M   | 45,X,-Y[9]/46,XY[11]                                                                               | NPM1+, FLT3-ITD- | Diagnostic       |
| 100565     | AML                                      | 65                | M   | 46,XY,t(6;11)(q27;q23)[19]/46,XY[1].nuc ish(MLLx2)(5'MLL sep 3'MLLx1)[148/200]                     | Not Done         | Diagnostic       |
| 120541     | AML with mutated NPM1                    | 51                | F   | 46,XX[20]                                                                                          | NPM1+, FLT3-ITD+ | Diagnostic       |
| 120287     | AML with mutated NPM1                    | 77                | M   | 46,XY[20]                                                                                          | NPM1+, FLT3-ITD+ | Diagnostic       |
| 120860     | AML with t(9;11)(p22;q23); MLLT-MLL      | 31                | F   | 46,XX,t(9;11)(p22;q23)[10]                                                                         | Not Done         | Diagnostic       |

Table S5. Clinical Characteristics of Primary AML Patient Samples, Related to STAR Methods.

| Gene shRNA name        | Reference             | Sequence                                                                                              |
|------------------------|-----------------------|-------------------------------------------------------------------------------------------------------|
| Control sgRNA          | N/A                   | 5'-CCCGAATCTCTATCGTGCGG-3'                                                                            |
| TAZ sgRNA1             | Gene ID: 6901         | 5'-TACGAGCTCATCGAGAAGCG-3'                                                                            |
| TAZ sgRNA2             | Gene ID: 6901         | 5'-GCTCATCGAGAAGCGAGGCC-3'                                                                            |
| PISD sgRNA             | Gene ID: 23761        | 5'-AGCTGCCACACTGGCTGCGC-3'                                                                            |
| Control shRNA (pLKO.1) | clonetechGfp_58 7s1c1 | 5'-CCGG TGC CCG ACA ACC ACT ACC TGA CTCGAG TCA GGT AGT GGT TGT CGG GCA TTTTT-3'                       |
| TAZ shRNA1 (pLKO.1)    | NM_000116             | 5'-CCGG TCC TAA CAG TCC GCC CTA CTT CTCGAG AAG TAG GGC GGA CTG TTA GGA TTTTTG-3'                      |
| TAZ shRNA2 (pLKO.1)    | NM_000116             | 5'-CCGG TGC TTC CTC AGT TAC ACA AAG CTCGAG CTT TGT GTA ACT GAG GAA GCA TTTTTG-3'                      |
| Control shRNA (pRS19)  | (Chan et al., 2015)   | 5'- ACCG GCA CTA CCA GAG CTA ACT CAG ATA GTA CT TCAAGAG AGTA CTA TCT GAG TTA GCT CTG GTA GTGC TTTT-3' |
| TAZ shRNA2 (pRS19)     | NM_000116             | 5'-ACCG TGC TTC CTC AGT TAC ACA AAG TCAAGAG CTT TGT GTA ACT GAG GAA GCA TTTT -3'                      |

Table S6. sgRNA or shRNA Sequences, Related to STAR Methods.

| Lipids    | Polarity | Molecular Ion | Mode      | m/z ion   | NCE  | Approximate RT (min) |
|-----------|----------|---------------|-----------|-----------|------|----------------------|
| 52:2 MLCL | -        | [M-H]-        | Top-5 DDA | 1165.7666 | 17.5 | 11.55 - 11.88        |
| 52:3 MLCL | -        | [M-H]-        | Top-5 DDA | 1163.7509 | 17.5 | 10.85 - 10.96        |
| 52:4 MLCL | -        | [M-H]-        | Top-5 DDA | 1161.7353 | 17.5 | 8.79 - 9.53          |
| 54:2 MLCL | -        | [M-H]-        | Top-5 DDA | 1193.7979 | 17.5 | 12.46 - 12.76        |
| 54:3 MLCL | -        | [M-H]-        | Top-5 DDA | 1191.7822 | 17.5 | 11.45 - 11.90        |
| 54:4 MLCL | -        | [M-H]-        | Top-5 DDA | 1189.7666 | 17.5 | 10.41 - 10.90        |
| 54:5 MLCL | -        | [M-H]-        | Top-5 DDA | 1187.7509 | 17.5 | 9.26 - 9.71          |
| 54:6 MLCL | -        | [M-H]-        | Top-5 DDA | 1185.7353 | 17.5 | 10.32 - 10.66        |
| 64:3 CL   | -        | [M-H]-        | Top-5 DDA | 1345.9188 | 17.5 | 14.51 - 14.74        |
| 66:2 CL   | -        | [M-H]-        | Top-5 DDA | 1375.9659 | 17.5 | 16.29 - 16.45        |
| 66:3 CL   | -        | [M-H]-        | Top-5 DDA | 1373.9502 | 17.5 | 15.41 - 15.70        |
| 66:4 CL   | -        | [M-H]-        | Top-5 DDA | 1371.9345 | 17.5 | 14.57 - 14.85        |
| 68:3 CL   | -        | [M-H]-        | Top-5 DDA | 1401.9816 | 17.5 | 16.23 - 16.55        |
| 68:4 CL   | -        | [M-H]-        | Top-5 DDA | 1399.9659 | 17.5 | 15.42 - 15.76        |
| 68:5 CL   | -        | [M-H]-        | Top-5 DDA | 1397.9493 | 17.5 | 14.71 - 14.98        |
| 70:4 CL   | -        | [M-H]-        | Top-5 DDA | 1427.9973 | 17.5 | 16.21 - 16.55        |
| 70:5 CL   | -        | [M-H]-        | Top-5 DDA | 1425.9817 | 17.5 | 15.54 - 15.85        |
| 70:6 CL   | -        | [M-H]-        | Top-5 DDA | 1423.9660 | 17.5 | 14.85 - 15.20        |
| 70:7 CL   | -        | [M-H]-        | Top-5 DDA | 1421.9503 | 17.5 | 15.43 - 15.73        |
| 72:5 CL   | -        | [M-H]-        | Top-5 DDA | 1454.0131 | 17.5 | 16.40 - 16.59        |
| 72:6 CL   | -        | [M-H]-        | Top-5 DDA | 1451.9974 | 17.5 | 15.69 - 15.97        |
| 72:7 CL   | -        | [M-H]-        | Top-5 DDA | 1449.9817 | 17.5 | 16.24 - 16.54        |
| 72:8 CL   | -        | [M-H]-        | Top-5 DDA | 1447.9661 | 17.5 | 15.55 - 15.81        |
| 72:9 CL   | -        | [M-H]-        | Top-5 DDA | 1445.9504 | 17.5 | 14.87 - 15.07        |
| 74:6 CL   | -        | [M-H]-        | Top-5 DDA | 1480.0288 | 17.5 | 16.52 - 16.59        |
| 74:7 CL   | -        | [M-H]-        | Top-5 DDA | 1478.0131 | 17.5 | 15.91 - 16.08        |
| 74:8 CL   | -        | [M-H]-        | Top-5 DDA | 1475.9975 | 17.5 | 16.36 - 16.61        |
| 74:9 CL   | -        | [M-H]-        | Top-5 DDA | 1473.9818 | 17.5 | 15.72 - 15.94        |

Table S7. Detection of Lipids by MS/MS, Related to STAR Methods. Abbreviations: MLCL = mono-lyso cardiolipin, CL – cardiolipin, DDA = data-dependent acquisition, m/z = mass-to-charge ratio, NCE = normalized collision energy, RT = retention time
